# Supplementary material for: Molecular Evolution of Infectious Pancreatic Necrosis Virus in China
Source: MDPI journal article supplement (doi:10.3390/v13030488), 2021-03-16
Supplement: s1 [file s1]

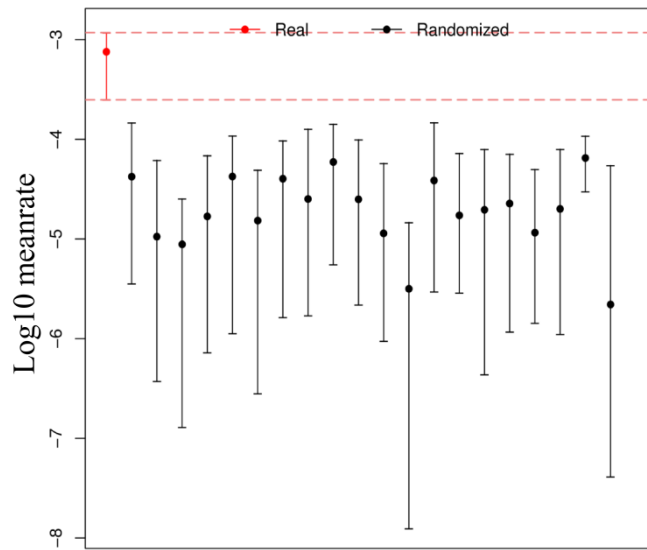

**Figure S1.** Date-randomization test (DRT) of genogroup 1 IPNV strains.

**Table S1** Marginal likelihoods of different combinations of clock model and tree prior, estimators of the marginal likelihood—path sampling (PS)

| Molecular clock model                        | Coalescent tree prior   | Log marginal likelihood |
|----------------------------------------------|-------------------------|-------------------------|
| Strict clock                                 | Bayesian skyline        | -4171.045               |
| Strict clock                                 | Exponential growth      | -4189.685               |
| Strict clock                                 | Constant size           | -4188.345               |
| <b>*Uncorrelated lognormal relaxed clock</b> | <b>Bayesian skyline</b> | <b>-4157.578</b>        |
| Uncorrelated lognormal relaxed clock         | Exponential growth      | -4174.000               |
| Uncorrelated lognormal relaxed clock         | Constant size           | -4169.600               |

\*the combination of clock model and tree prior that best fit our sequences data in this study.

**Table S2** Marginal likelihoods of different combinations of clock model and tree prior, stepping-stone (SS) sampling

| Molecular clock model                        | Coalescent tree prior   | Log marginal likelihood |
|----------------------------------------------|-------------------------|-------------------------|
| Strict clock                                 | Bayesian skyline        | -4172.473               |
| Strict clock                                 | Exponential growth      | -4191.000               |
| Strict clock                                 | Constant size           | -4188.846               |
| <b>*Uncorrelated lognormal relaxed clock</b> | <b>Bayesian skyline</b> | <b>-4158.026</b>        |
| Uncorrelated lognormal relaxed clock         | Exponential growth      | -4175.153               |
| Uncorrelated lognormal relaxed clock         | Constant size           | -4170.961               |

\*the combination of clock model and tree prior that best fit our sequences data in this study.
